# Supplementary material for: Cytogenotoxic potential and toxicity in adult Danio rerio (zebrafish) exposed to chloramine T
Source: PeerJ journal article supplement (doi:10.7717/peerj.16452), 2023-12-04
Supplement: data_raw.pdf [file data_raw.pdf]

|                                             |            |              |              |             |               |
|---------------------------------------------|------------|--------------|--------------|-------------|---------------|
| Table Analyzed                              | histo GILL |              |              |             |               |
| Data sets analyzed                          | A-D        |              |              |             |               |
| ANOVA summary                               |            |              |              |             |               |
| F                                           |            |              |              |             | 7.648         |
| P value                                     |            |              |              |             | 0.0013        |
| P value summary                             |            |              |              | **          |               |
| Significant diff. among means (P < 0.05)?   | Yes        |              |              |             |               |
| R square                                    |            |              |              |             | 0.5343        |
| Brown-Forsythe test                         |            |              |              |             |               |
| F (DFn, DFd)                                |            |              |              |             | 4.842 (3, 20) |
| P value                                     |            |              |              |             | 0.0108        |
| P value summary                             |            |              |              | *           |               |
| Are SDs significantly different (P < 0.05)? | Yes        |              |              |             |               |
| Bartlett's test                             |            |              |              |             |               |
| Bartlett's statistic (corrected)            |            |              |              |             | 12.51         |
| P value                                     |            |              |              |             | 0.0058        |
| P value summary                             |            |              |              | **          |               |
| Are SDs significantly different (P < 0.05)? | Yes        |              |              |             |               |
| ANOVA table                                 |            |              |              |             |               |
|                                             | SS         | DF           | MS           | F (DFn, DF) | P value       |
| Treatment (between columns)                 | 260.4      | 3            | 86.79        | F (3, 20) = | P=0.0013      |
| Residual (within columns)                   | 227        | 20           | 11.35        |             |               |
| Total                                       | 487.3      | 23           |              |             |               |
| Data summary                                |            |              |              |             |               |
| Number of treatments (columns)              |            | 4            |              |             |               |
| Number of values (total)                    |            | 24           |              |             |               |
| Number of families                          |            | 1            |              |             |               |
| Number of comparisons per family            |            | 6            |              |             |               |
| Alpha                                       |            | 0.05         |              |             |               |
| Tukey's multiple comparisons test           |            |              |              |             |               |
|                                             | Mean Diff. | 95.00% CI    | Significant? | Summary     | Adjusted P    |
| control vs. 70                              | -7.458     | -12.55 to -2 | Yes          | **          | 0.0029        |
| control vs. 140                             | -5.583     | -11.67 to 0  | No           | ns          | 0.0794        |
| control vs. 200                             | -8.333     | -13.78 to -2 | Yes          | **          | 0.0019        |
| 70 vs. 140                                  | 1.875      | -3.899 to 7  | No           | ns          | 0.8003        |
| 70 vs. 200                                  | -0.875     | -5.967 to 4  | No           | ns          | 0.9624        |
| 140 vs. 200                                 | -2.75      | -8.836 to 3  | No           | ns          | 0.5948        |
| Test details                                |            |              |              |             |               |
|                                             | Mean 1     | Mean 2       | Mean Diff.   | SE of diff. | n1            |
| control vs. 70                              | 0.6667     | 8.125        | -7.458       | 1.819       | 6             |
| control vs. 140                             | 0.6667     | 6.25         | -5.583       | 2.174       | 6             |
| control vs. 200                             | 0.6667     | 9            | -8.333       | 1.945       | 6             |
| 70 vs. 140                                  | 8.125      | 6.25         | 1.875        | 2.063       | 8             |

|             |       |   |        |       |   |
|-------------|-------|---|--------|-------|---|
| 70 vs. 200  | 8.125 | 9 | -0.875 | 1.819 | 8 |
| 140 vs. 200 | 6.25  | 9 | -2.75  | 2.174 | 4 |

Value  
A-B  
A-C  
A-D  
B-C  
B-D  
C-D

| n2 | q     | DF |
|----|-------|----|
| 8  | 5.798 | 20 |
| 4  | 3.631 | 20 |
| 6  | 6.059 | 20 |
| 4  | 1.285 | 20 |

|   |        |    |
|---|--------|----|
| 6 | 0.6802 | 20 |
| 6 | 1.789  | 20 |

Table Analyzed histo LIVER  
 Data sets analyzed A-D

ANOVA summary

F 32.15  
 P value <0.0001  
 P value summary \*\*\*\*  
 Significant diff. among means (P < 0.05)? Yes  
 R square 0.7813

Brown-Forsythe test

F (DFn, DFd) 1.867 (3, 27)  
 P value 0.1591  
 P value summary ns  
 Are SDs significantly different (P < 0.05)? No

Bartlett's test

Bartlett's statistic (corrected) 31.64  
 P value <0.0001  
 P value summary \*\*\*\*  
 Are SDs significantly different (P < 0.05)? Yes

ANOVA table

|                             | SS    | DF | MS    | F (DFn, DF P value   |
|-----------------------------|-------|----|-------|----------------------|
| Treatment (between columns) | 516.7 | 3  | 172.2 | F (3, 27) = P<0.0001 |
| Residual (within columns)   | 144.7 | 27 | 5.358 |                      |
| Total                       | 661.4 | 30 |       |                      |

Data summary

Number of treatments (columns) 4  
 Number of values (total) 31

Number of families 1  
 Number of comparisons per family 6  
 Alpha 0.05

Tukey's multiple comparisons test

|                 | Mean Diff. | 95.00% CI    | Significant? | Summary | Adjusted P |
|-----------------|------------|--------------|--------------|---------|------------|
| control vs. 70  | -5.639     | -8.717 to -2 | Yes          | ***     | 0.0002     |
| control vs. 140 | -7.603     | -10.80 to -4 | Yes          | ****    | <0.0001    |
| control vs. 200 | -11.03     | -14.22 to -7 | Yes          | ****    | <0.0001    |
| 70 vs. 140      | -1.964     | -5.243 to 1  | No           | ns      | 0.3743     |
| 70 vs. 200      | -5.393     | -8.671 to -2 | Yes          | ***     | 0.0006     |
| 140 vs. 200     | -3.429     | -6.815 to 0  | Yes          | *       | 0.0464     |

Test details

|                 | Mean 1 | Mean 2 | Mean Diff. | SE of diff. | n1 |
|-----------------|--------|--------|------------|-------------|----|
| control vs. 70  | 0.1111 | 5.75   | -5.639     | 1.125       | 9  |
| control vs. 140 | 0.1111 | 7.714  | -7.603     | 1.167       | 9  |
| control vs. 200 | 0.1111 | 11.14  | -11.03     | 1.167       | 9  |

|             |       |       |        |       |   |
|-------------|-------|-------|--------|-------|---|
| 70 vs. 140  | 5.75  | 7.714 | -1.964 | 1.198 | 8 |
| 70 vs. 200  | 5.75  | 11.14 | -5.393 | 1.198 | 8 |
| 140 vs. 200 | 7.714 | 11.14 | -3.429 | 1.237 | 7 |

Value  
A-B  
A-C  
A-D  
B-C  
B-D  
C-D

| n2 | q     | DF |
|----|-------|----|
| 8  | 7.09  | 27 |
| 7  | 9.217 | 27 |
| 7  | 13.37 | 27 |

|   |       |    |
|---|-------|----|
| 7 | 2.319 | 27 |
| 7 | 6.366 | 27 |
| 7 | 3.919 | 27 |



| Table Analyzed                              |               | AChE adults        |              |             |            |  |
|---------------------------------------------|---------------|--------------------|--------------|-------------|------------|--|
| Data sets analyzed                          | A-D           |                    |              |             |            |  |
| ANOVA summary                               |               |                    |              |             |            |  |
| F                                           | 0.4979        |                    |              |             |            |  |
| P value                                     | 0.6906        |                    |              |             |            |  |
| P value summary                             | ns            |                    |              |             |            |  |
| Significant diff. among means (P < 0.05)?   | No            |                    |              |             |            |  |
| R square                                    | 0.1107        |                    |              |             |            |  |
| Brown-Forsythe test                         |               |                    |              |             |            |  |
| F (DFn, DFd)                                | 2.004 (3, 12) |                    |              |             |            |  |
| P value                                     | 0.1672        |                    |              |             |            |  |
| P value summary                             | ns            |                    |              |             |            |  |
| Are SDs significantly different (P < 0.05)? | No            |                    |              |             |            |  |
| Bartlett's test                             |               |                    |              |             |            |  |
| Bartlett's statistic (corrected)            | 3             |                    |              |             |            |  |
| P value                                     | 0.3916        |                    |              |             |            |  |
| P value summary                             | ns            |                    |              |             |            |  |
| Are SDs significantly different (P < 0.05)? | No            |                    |              |             |            |  |
| ANOVA table                                 |               |                    |              |             |            |  |
|                                             | SS            | DF                 |              |             |            |  |
| Treatment (between columns)                 | 1064521       | 3                  |              |             |            |  |
| Residual (within columns)                   | 8551773       | 12                 |              |             |            |  |
| Total                                       | 9616294       | 15                 |              |             |            |  |
| Data summary                                |               |                    |              |             |            |  |
| Number of treatments (columns)              | 4             |                    |              |             |            |  |
| Number of values (total)                    | 16            |                    |              |             |            |  |
| Number of families                          | 1             |                    |              |             |            |  |
| Number of comparisons per family            | 6             |                    |              |             |            |  |
| Alpha                                       | 0.05          |                    |              |             |            |  |
| Tukey's multiple comparisons test           |               |                    |              |             |            |  |
|                                             | Mean Diff.    | 95.00% CI of diff. | Significant? | Summary     | Adjusted P |  |
| control vs. 1                               | 665.8         | -1106 to 2438      | No           | ns          | 0.6875     |  |
| control vs. 2                               | 423.3         | -1349 to 2195      | No           | ns          | 0.8916     |  |
| control vs. 3                               | 134.8         | -1637 to 1907      | No           | ns          | 0.9957     |  |
| 1 vs. 2                                     | -242.5        | -2015 to 1530      | No           | ns          | 0.9763     |  |
| 1 vs. 3                                     | -531          | -2303 to 1241      | No           | ns          | 0.8104     |  |
| 2 vs. 3                                     | -288.5        | -2061 to 1484      | No           | ns          | 0.9614     |  |
| Test details                                |               |                    |              |             |            |  |
|                                             | Mean 1        | Mean 2             | Mean Diff.   | SE of diff. | n1         |  |
| control vs. 1                               | 2723          | 2057               | 665.8        | 596.9       | 4          |  |
| control vs. 2                               | 2723          | 2299               | 423.3        | 596.9       | 4          |  |
| control vs. 3                               | 2723          | 2588               | 134.8        | 596.9       | 4          |  |
| 1 vs. 2                                     | 2057          | 2299               | -242.5       | 596.9       | 4          |  |
| 1 vs. 3                                     | 2057          | 2588               | -531         | 596.9       | 4          |  |
| 2 vs. 3                                     | 2299          | 2588               | -288.5       | 596.9       | 4          |  |

Value

A-B

A-C

A-D

B-C

B-D

C-D

| n2 | q      | DF |
|----|--------|----|
| 4  | 1.577  | 12 |
| 4  | 1.003  | 12 |
| 4  | 0.3192 | 12 |
| 4  | 0.5745 | 12 |
| 4  | 1.258  | 12 |
| 4  | 0.6835 | 12 |

MS            F (DFn, DF P value  
354840 F (3, 12) = P=0.6906  
712648

Table Analyzed MN adultos  
 Data sets analyzed A-D

ANOVA summary

F 1.797  
 P value 0.1689  
 P value summary ns  
 Significant diff. among means (P < 0.05)? No  
 R square 0.1524

Brown-Forsythe test

F (DFn, DFd) 1.797 (3, 30)  
 P value 0.1689  
 P value summary ns  
 Are SDs significantly different (P < 0.05)? No

Bartlett's test

Bartlett's statistic (corrected)  
 P value  
 P value summary  
 Are SDs significantly different (P < 0.05)?

| ANOVA table                 | SS    | DF | MS     | F (DFn, DF P value   |
|-----------------------------|-------|----|--------|----------------------|
| Treatment (between columns) | 1.792 | 3  | 0.5975 | F (3, 30) = P=0.1689 |
| Residual (within columns)   | 9.972 | 30 | 0.3324 |                      |
| Total                       | 11.76 | 33 |        |                      |

Data summary

Number of treatments (columns) 4  
 Number of values (total) 34

Number of families 1  
 Number of comparisons per family 6  
 Alpha 0.05

Tukey's multiple comparisons test

|                 | Mean Diff. | 95.00% CI    | Significant? | Summary | Adjusted P |
|-----------------|------------|--------------|--------------|---------|------------|
| control vs. 70  | -0.4444    | -1.183 to 0. | No           | ns      | 0.3749     |
| control vs. 140 | -0.375     | -1.137 to 0. | No           | ns      | 0.5464     |
| control vs. 200 | -0.625     | -1.387 to 0. | No           | ns      | 0.138      |
| 70 vs. 140      | 0.06944    | -0.6923 to ( | No           | ns      | 0.9945     |
| 70 vs. 200      | -0.1806    | -0.9423 to ( | No           | ns      | 0.9166     |
| 140 vs. 200     | -0.25      | -1.034 to 0. | No           | ns      | 0.8216     |

Test details

|                 | Mean 1 | Mean 2 | Mean Diff. | SE of diff. | n1 |
|-----------------|--------|--------|------------|-------------|----|
| control vs. 70  | 0      | 0.4444 | -0.4444    | 0.2718      | 9  |
| control vs. 140 | 0      | 0.375  | -0.375     | 0.2802      | 9  |
| control vs. 200 | 0      | 0.625  | -0.625     | 0.2802      | 9  |
| 70 vs. 140      | 0.4444 | 0.375  | 0.06944    | 0.2802      | 9  |

|             |        |       |         |        |   |
|-------------|--------|-------|---------|--------|---|
| 70 vs. 200  | 0.4444 | 0.625 | -0.1806 | 0.2802 | 9 |
| 140 vs. 200 | 0.375  | 0.625 | -0.25   | 0.2883 | 8 |

|                                     |               |
|-------------------------------------|---------------|
| Table Analyzed                      | MN adultos    |
| Column B                            | 70            |
| vs.                                 | vs.           |
| Column A                            | control       |
| Mann Whitney test                   |               |
| P value                             | 0.0824        |
| Exact or approximate P value?       | Exact         |
| P value summary                     | ns            |
| Significantly different (P < 0.05)? | No            |
| One- or two-tailed P value?         | Two-tailed    |
| Sum of ranks in column A,B          | 67.50 , 103.5 |
| Mann-Whitney U                      | 22.5          |
| Difference between medians          |               |
| Median of column A                  | 0.000, n=9    |
| Median of column B                  | 0.000, n=9    |
| Difference: Actual                  | 0             |
| Difference: Hodges-Lehmann          | 0             |

|                                     |               |
|-------------------------------------|---------------|
| Table Analyzed                      | MN adultos    |
| Column C                            | 140           |
| vs.                                 | vs.           |
| Column A                            | control       |
| Mann Whitney test                   |               |
| P value                             | 0.0824        |
| Exact or approximate P value?       | Exact         |
| P value summary                     | ns            |
| Significantly different (P < 0.05)? | No            |
| One- or two-tailed P value?         | Two-tailed    |
| Sum of ranks in column A,C          | 67.50 , 85.50 |
| Mann-Whitney U                      | 22.5          |
| Difference between medians          |               |
| Median of column A                  | 0.000, n=9    |
| Median of column C                  | 0.000, n=8    |
| Difference: Actual                  | 0             |
| Difference: Hodges-Lehmann          | 0             |

Value  
A-B  
A-C  
A-D  
B-C  
B-D  
C-D

| n2 | q      | DF |
|----|--------|----|
| 9  | 2.313  | 30 |
| 8  | 1.893  | 30 |
| 8  | 3.155  | 30 |
| 8  | 0.3506 | 30 |

|                |            |
|----------------|------------|
| Table Analyzed | MN adultos |
| Column D       | 200        |
| vs.            | vs.        |

|   |        |    |
|---|--------|----|
| 8 | 0.9114 | 30 |
| 8 | 1.226  | 30 |

|          |         |
|----------|---------|
| Column A | control |
|----------|---------|

Mann Whitney test

|                                     |               |
|-------------------------------------|---------------|
| P value                             | 0.0824        |
| Exact or approximate P value?       | Exact         |
| P value summary                     | ns            |
| Significantly different (P < 0.05)? | No            |
| One- or two-tailed P value?         | Two-tailed    |
| Sum of ranks in column A,D          | 67.50 , 85.50 |
| Mann-Whitney U                      | 22.5          |

Difference between medians

|                            |            |
|----------------------------|------------|
| Median of column A         | 0.000, n=9 |
| Median of column D         | 0.000, n=8 |
| Difference: Actual         | 0          |
| Difference: Hodges-Lehmann | 0          |

|                                             |               |              |              |                      |            |
|---------------------------------------------|---------------|--------------|--------------|----------------------|------------|
| Table Analyzed                              | AN adultos    |              |              |                      |            |
| Data sets analyzed                          | A-D           |              |              |                      |            |
| ANOVA summary                               |               |              |              |                      |            |
| F                                           | 4.021         |              |              |                      |            |
| P value                                     | 0.0162        |              |              |                      |            |
| P value summary                             | *             |              |              |                      |            |
| Significant diff. among means (P < 0.05)?   | Yes           |              |              |                      |            |
| R square                                    | 0.2868        |              |              |                      |            |
| Brown-Forsythe test                         |               |              |              |                      |            |
| F (DFn, DFd)                                | 2.495 (3, 30) |              |              |                      |            |
| P value                                     | 0.0789        |              |              |                      |            |
| P value summary                             | ns            |              |              |                      |            |
| Are SDs significantly different (P < 0.05)? | No            |              |              |                      |            |
| Bartlett's test                             |               |              |              |                      |            |
| Bartlett's statistic (corrected)            | 7.628         |              |              |                      |            |
| P value                                     | 0.0544        |              |              |                      |            |
| P value summary                             | ns            |              |              |                      |            |
| Are SDs significantly different (P < 0.05)? | No            |              |              |                      |            |
| ANOVA table                                 |               |              |              |                      |            |
|                                             | SS            | DF           | MS           | F (DFn, DF P value   |            |
| Treatment (between columns)                 | 1.545         | 3            | 0.5149       | F (3, 30) = P=0.0162 |            |
| Residual (within columns)                   | 3.842         | 30           | 0.1281       |                      |            |
| Total                                       | 5.386         | 33           |              |                      |            |
| Data summary                                |               |              |              |                      |            |
| Number of treatments (columns)              | 4             |              |              |                      |            |
| Number of values (total)                    | 34            |              |              |                      |            |
| Number of families                          | 1             |              |              |                      |            |
| Number of comparisons per family            | 6             |              |              |                      |            |
| Alpha                                       | 0.05          |              |              |                      |            |
| Tukey's multiple comparisons test           |               |              |              |                      |            |
|                                             | Mean Diff.    | 95.00% CI    | Significant? | Summary              | Adjusted P |
| control vs. 70                              | -0.2          | -0.6587 to ( | No           | ns                   | 0.6404     |
| control vs. 140                             | -0.1139       | -0.5867 to ( | No           | ns                   | 0.913      |
| control vs. 200                             | -0.5764       | -1.049 to -0 | Yes          | *                    | 0.0122     |
| 70 vs. 140                                  | 0.08611       | -0.3867 to ( | No           | ns                   | 0.9595     |
| 70 vs. 200                                  | -0.3764       | -0.8492 to ( | No           | ns                   | 0.1564     |
| 140 vs. 200                                 | -0.4625       | -0.9490 to ( | No           | ns                   | 0.0671     |
| Test details                                |               |              |              |                      |            |
|                                             | Mean 1        | Mean 2       | Mean Diff.   | SE of diff.          | n1         |
| control vs. 70                              | 0.2111        | 0.4111       | -0.2         | 0.1687               | 9          |
| control vs. 140                             | 0.2111        | 0.325        | -0.1139      | 0.1739               | 9          |
| control vs. 200                             | 0.2111        | 0.7875       | -0.5764      | 0.1739               | 9          |
| 70 vs. 140                                  | 0.4111        | 0.325        | 0.08611      | 0.1739               | 9          |



|             |        |        |         |        |   |
|-------------|--------|--------|---------|--------|---|
| 70 vs. 200  | 0.4111 | 0.7875 | -0.3764 | 0.1739 | 9 |
| 140 vs. 200 | 0.325  | 0.7875 | -0.4625 | 0.1789 | 8 |

|                                     |               |
|-------------------------------------|---------------|
| Table Analyzed                      | AN adultos    |
| Column B                            | 70            |
| vs.                                 | vs.           |
| Column A                            | control       |
| Mann Whitney test                   |               |
| P value                             | 0.0966        |
| Exact or approximate P value?       | Exact         |
| P value summary                     | ns            |
| Significantly different (P < 0.05)? | No            |
| One- or two-tailed P value?         | Two-tailed    |
| Sum of ranks in column A,B          | 66.50 , 104.5 |
| Mann-Whitney U                      | 21.5          |
| Difference between medians          |               |
| Median of column A                  | 0.2000, n=9   |
| Median of column B                  | 0.4000, n=9   |
| Difference: Actual                  | 0.2           |
| Difference: Hodges-Lehmann          | 0.2           |

|                                     |             |
|-------------------------------------|-------------|
| Table Analyzed                      | AN adultos  |
| Column C                            | 140         |
| vs.                                 | vs.         |
| Column A                            | control     |
| Mann Whitney test                   |             |
| P value                             | 0.4768      |
| Exact or approximate P value?       | Exact       |
| P value summary                     | ns          |
| Significantly different (P < 0.05)? | No          |
| One- or two-tailed P value?         | Two-tailed  |
| Sum of ranks in column A,C          | 73 , 80     |
| Mann-Whitney U                      | 28          |
| Difference between medians          |             |
| Median of column A                  | 0.2000, n=9 |
| Median of column C                  | 0.2500, n=8 |
| Difference: Actual                  | 0.05        |
| Difference: Hodges-Lehmann          | 0.1         |

Value  
A-B  
A-C  
A-D  
B-C  
B-D  
C-D

| n2 | q      | DF |
|----|--------|----|
| 9  | 1.677  | 30 |
| 8  | 0.9263 | 30 |
| 8  | 4.688  | 30 |
| 8  | 0.7004 | 30 |

Table Analyzed AN adultos

|   |       |    |
|---|-------|----|
| 8 | 3.061 | 30 |
| 8 | 3.656 | 30 |

|          |         |
|----------|---------|
| Column D | 200     |
| vs.      | vs.     |
| Column A | control |

|                                     |            |
|-------------------------------------|------------|
| Mann Whitney test                   |            |
| P value                             | 0.0101     |
| Exact or approximate P value?       | Exact      |
| P value summary                     | *          |
| Significantly different (P < 0.05)? | Yes        |
| One- or two-tailed P value?         | Two-tailed |
| Sum of ranks in column A,D          | 55 , 98    |
| Mann-Whitney U                      | 10         |

|                            |             |
|----------------------------|-------------|
| Difference between medians |             |
| Median of column A         | 0.2000, n=9 |
| Median of column D         | 0.6500, n=8 |
| Difference: Actual         | 0.45        |
| Difference: Hodges-Lehmann | 0.4         |
